# Supplementary material for: Strained hybrid perovskite thin films and their impact on the intrinsic stability of perovskite solar cells
Source: PubMed Central journal article supplement — Sci Adv. 2017 Nov 17;3(11):eaao5616. doi: 10.1126/sciadv.aao5616 (PMC5694650; doi:10.1126/sciadv.aao5616), 2017-11-17
Supplement: aao5616_SM.pdf [file aao5616_SM.pdf]

## Supplementary Materials for **Strained hybrid perovskite thin films and their impact on the intrinsic stability of perovskite solar cells**

Jingjing Zhao, Yehao Deng, Haotong Wei, Xiaopeng Zheng, Zhenhua Yu, Yuchuan Shao,  
Jeffrey E. Shield, Jinsong Huang

Published 17 November 2017, *Sci. Adv.* **3**, eaao5616 (2017)  
DOI: 10.1126/sciadv.aao5616

### **This PDF file includes:**

- fig. S1. Strain state of MAPbI<sub>3</sub> films and scraped powder made by different methods on different substrates and with different compositions.
- fig. S2. In situ out-of-plane XRD and the calculated lattice parameter of the MAPbI<sub>3</sub> powder under different temperatures.
- fig. S3. Strain state for MAPbI<sub>3</sub> on PET substrate.
- fig. S4. Strain state of MAPbI<sub>3</sub> films formed at different temperatures.
- fig. S5. Effect of post-annealing on strain state.
- fig. S6. Out-of-plane XRD of the MAPbI<sub>3</sub> on a flexible substrate with different bending states.
- fig. S7. Distribution of strain on the substrate.
- fig. S8. Morphology of MAPbI<sub>3</sub> film on PTAA/ITO and PTAA/glass substrates.
- fig. S9. Degradation of strained MAPbI<sub>3</sub> film on SnO<sub>2</sub> substrate under illumination.

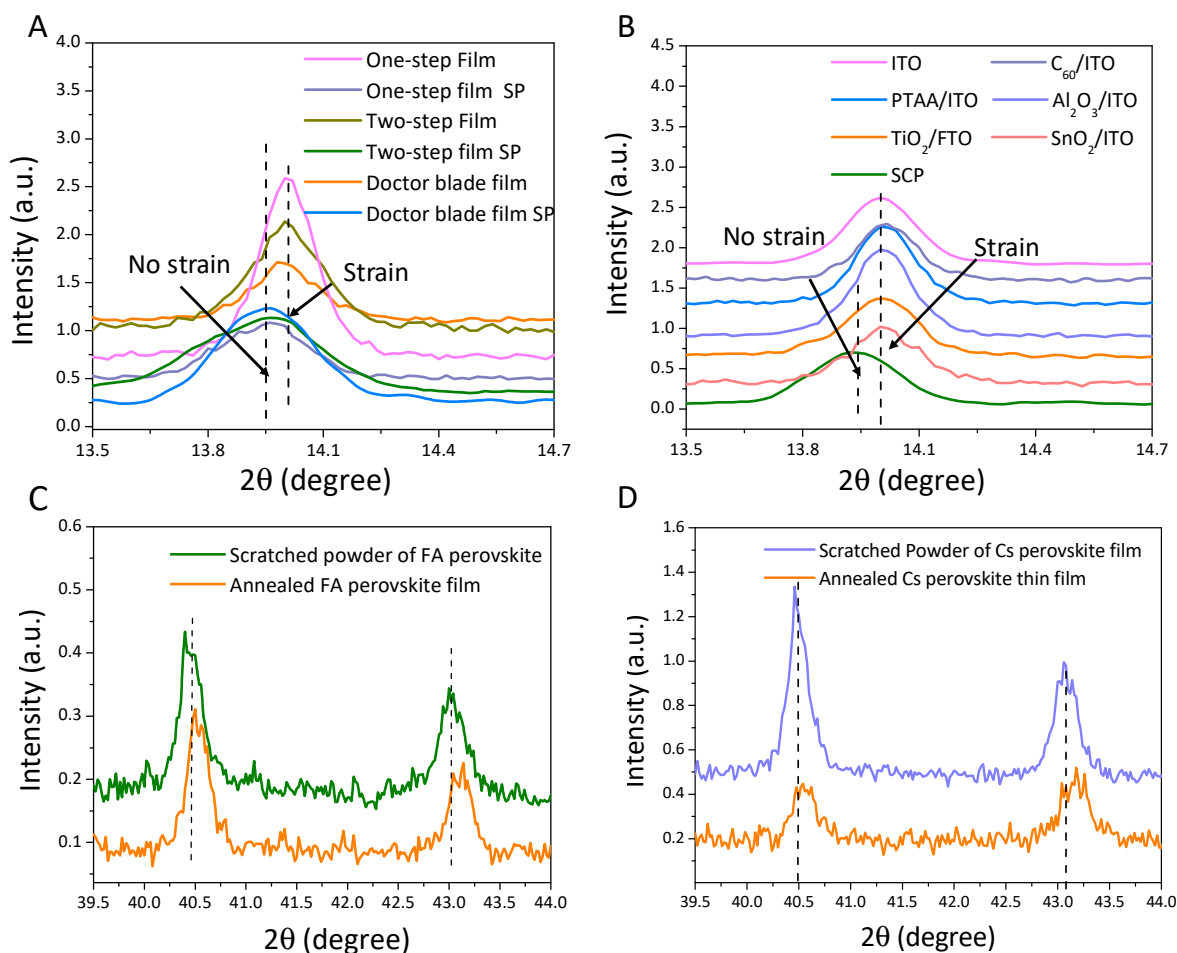

**fig. S1. Strain state of MAPbI<sub>3</sub> films and scraped powder made by different methods on different substrates and with different compositions. (A)** Out-of-plane XRD of MAPbI<sub>3</sub> film and its corresponding scraped powder (SP) (110) plane made by different methods, including one-step method, two-step method and doctor blading method. **(B)** Out of plane XRD of MAPbI<sub>3</sub> single crystal powder (SCP) and films made on different substrates, including ITO/glass, C<sub>60</sub>/ITO/glass, PTAA/ITO/glass, Al<sub>2</sub>O<sub>3</sub>/ITO/glass, TiO<sub>2</sub>/FTO/glass and SnO<sub>2</sub>/ITO/glass. **(C)** Out of plane XRD comparison of the annealed film and scraped powder of different perovskites, including FA perovskite ((FA<sub>0.85</sub>MA<sub>0.15</sub>)Pb(I<sub>0.85</sub>Br<sub>0.15</sub>)<sub>3</sub>) and **(D)** Cs perovskite (Cs<sub>0.05</sub>(FA<sub>0.85</sub>MA<sub>0.15</sub>)<sub>0.95</sub>Pb(I<sub>0.85</sub>Br<sub>0.15</sub>)<sub>3</sub>).

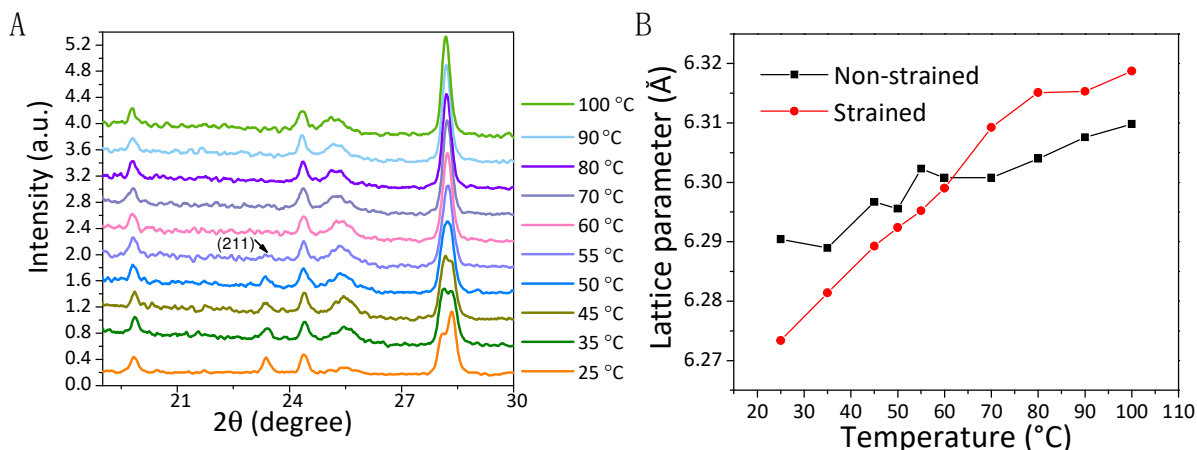

**fig. S2. In situ out-of-plane XRD and the calculated lattice parameter of the MAPbI<sub>3</sub> powder under different temperatures.** (A) In-situ out of plane XRD of MAPbI<sub>3</sub> powder. At 55 °C, the (211) peak starts to disappear. (B) Lattice parameters of the strained perovskite film and the non-strained perovskite powder. The lattice parameter for tetragonal MAPbI<sub>3</sub> is represented by  $(2a+c)/3$ .

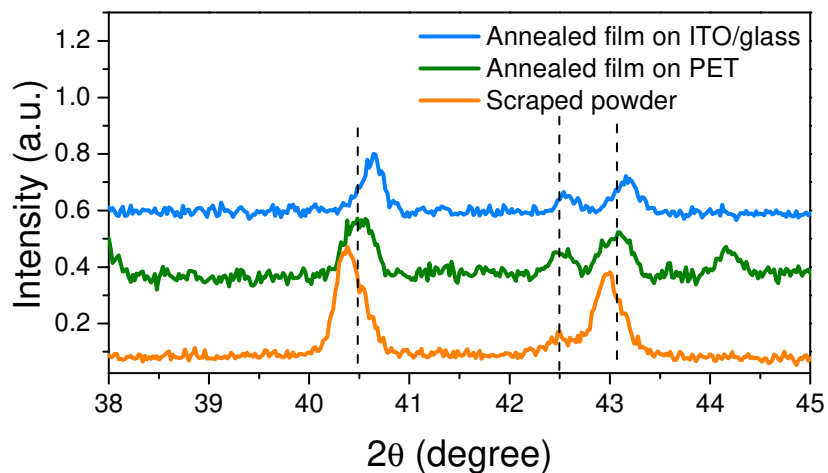

**fig. S3. Strain state for MAPbI<sub>3</sub> on PET substrate.** Out of plane XRD of the MAPbI<sub>3</sub> scraped powder, annealed films on ITO/glass and PET substrates.

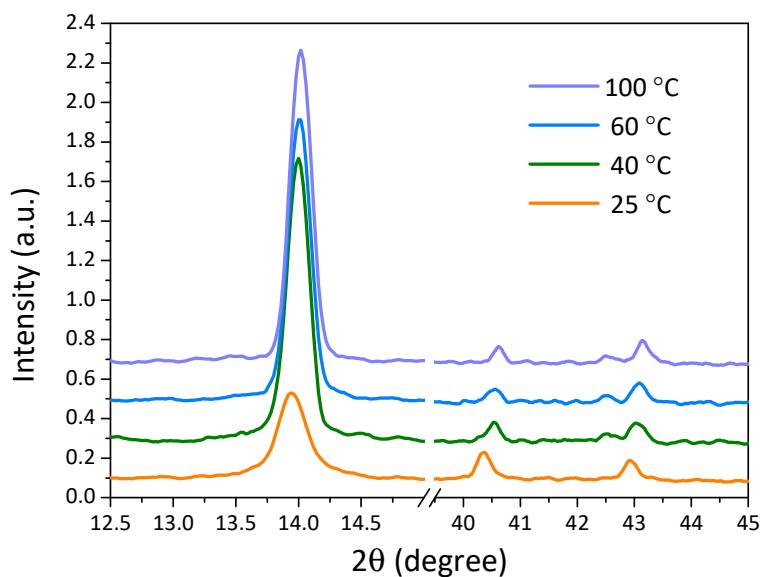

**fig. S4. Strain state of MAPbI<sub>3</sub> films formed at different temperatures.** Out of plane XRD of the MAPbI<sub>3</sub> films formed at 25 °C, 40 °C, 60 °C, and 100 °C.

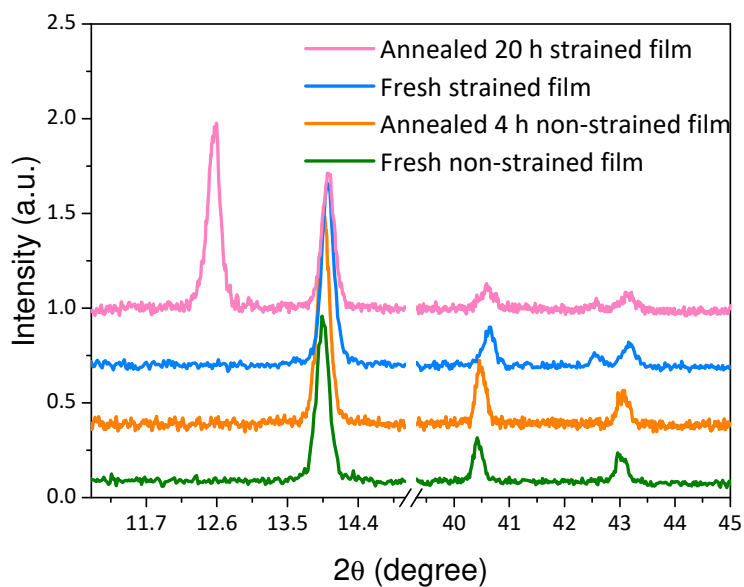

**fig. S5. Effect of post-annealing on strain state.** Out of plane XRD of the strained and non-strained MAPbI<sub>3</sub> films before and after post-annealing.

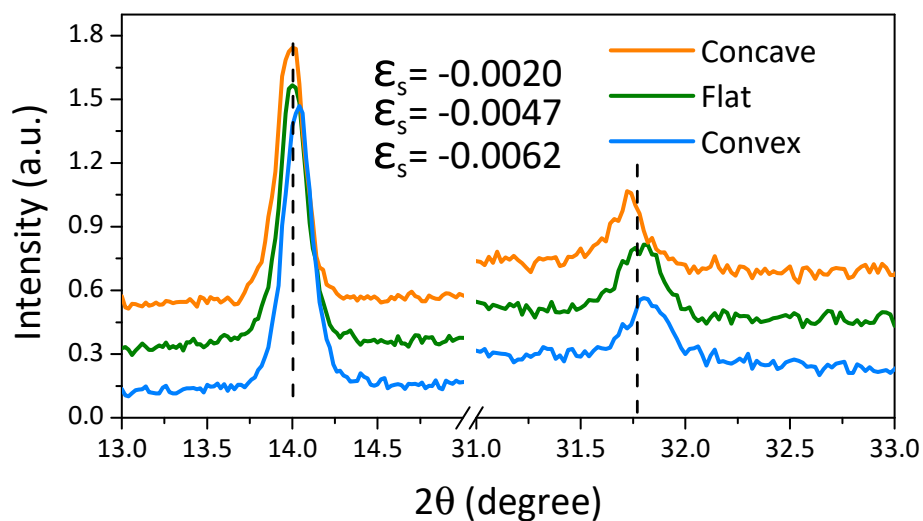

**fig. S6. Out-of-plane XRD of the MAPbI<sub>3</sub> on a flexible substrate with different bending states.**  $\epsilon_s$  is calculated by  $\epsilon_s = (d_{\text{strained (110)}} - d_{\text{non-strained (110)}}) / d_{\text{non-strained (110)}}$ . The bending strain applied on the films are  $\epsilon_b = +0.0023, 0$  and  $-0.0023$  for concave, flat and convex films.

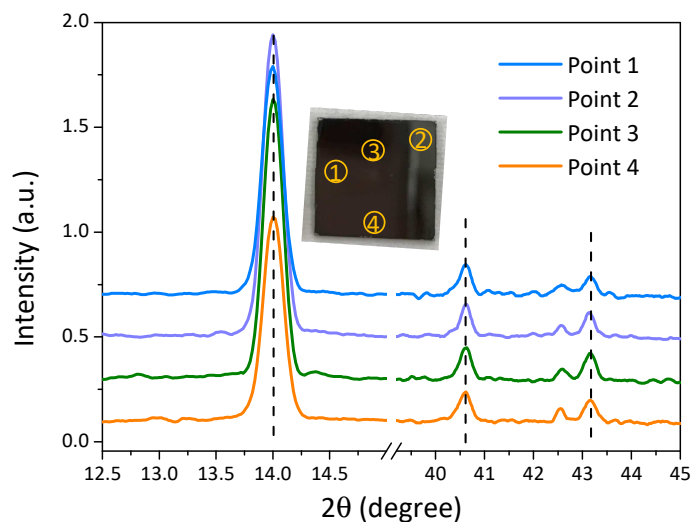

**fig. S7. Distribution of strain on the substrate.** Out of plane XRD of MAPbI<sub>3</sub> film measured at different locations corresponding to the inset picture. Inset: picture of a spin-coated MAPbI<sub>3</sub> film.

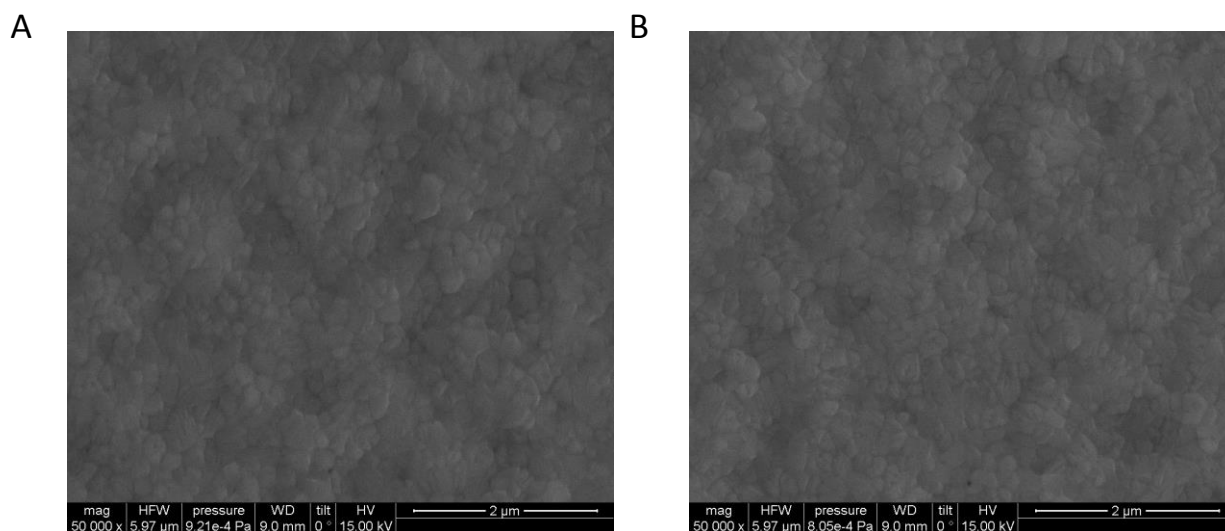

**fig. S8. Morphology of MAPbI<sub>3</sub> film on PTAA/ITO and PTAA/glass substrates. (A)** SEM image of perovskite film on PTAA/ITO and **(B)** on PTAA/glass substrates.

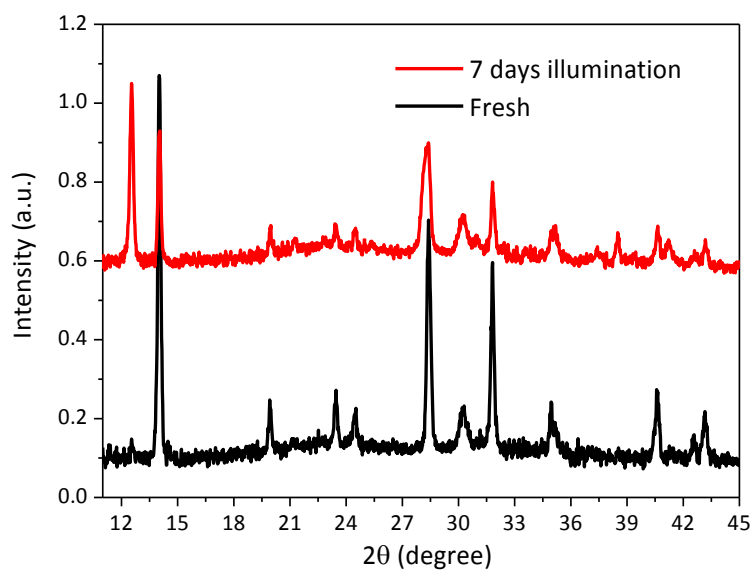

**fig. S9. Degradation of strained MAPbI<sub>3</sub> film on SnO<sub>2</sub> substrate under illumination.** Out of plane XRD of perovskite film on SnO<sub>2</sub>/ITO/glass substrate under illumination.
